# Supplementary material for: Fossils matter: improved estimates of divergence times in Pinus reveal older diversification
Source: PubMed Central journal article supplement (PMC5381128; doi:10.1186/s12862-017-0941-z), 2017-04-04

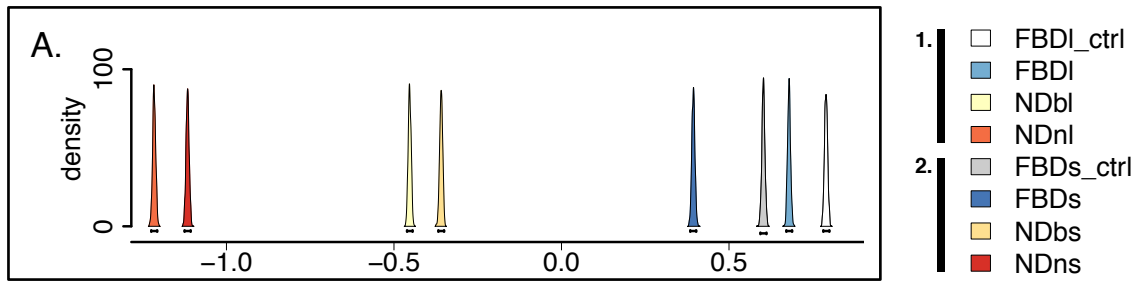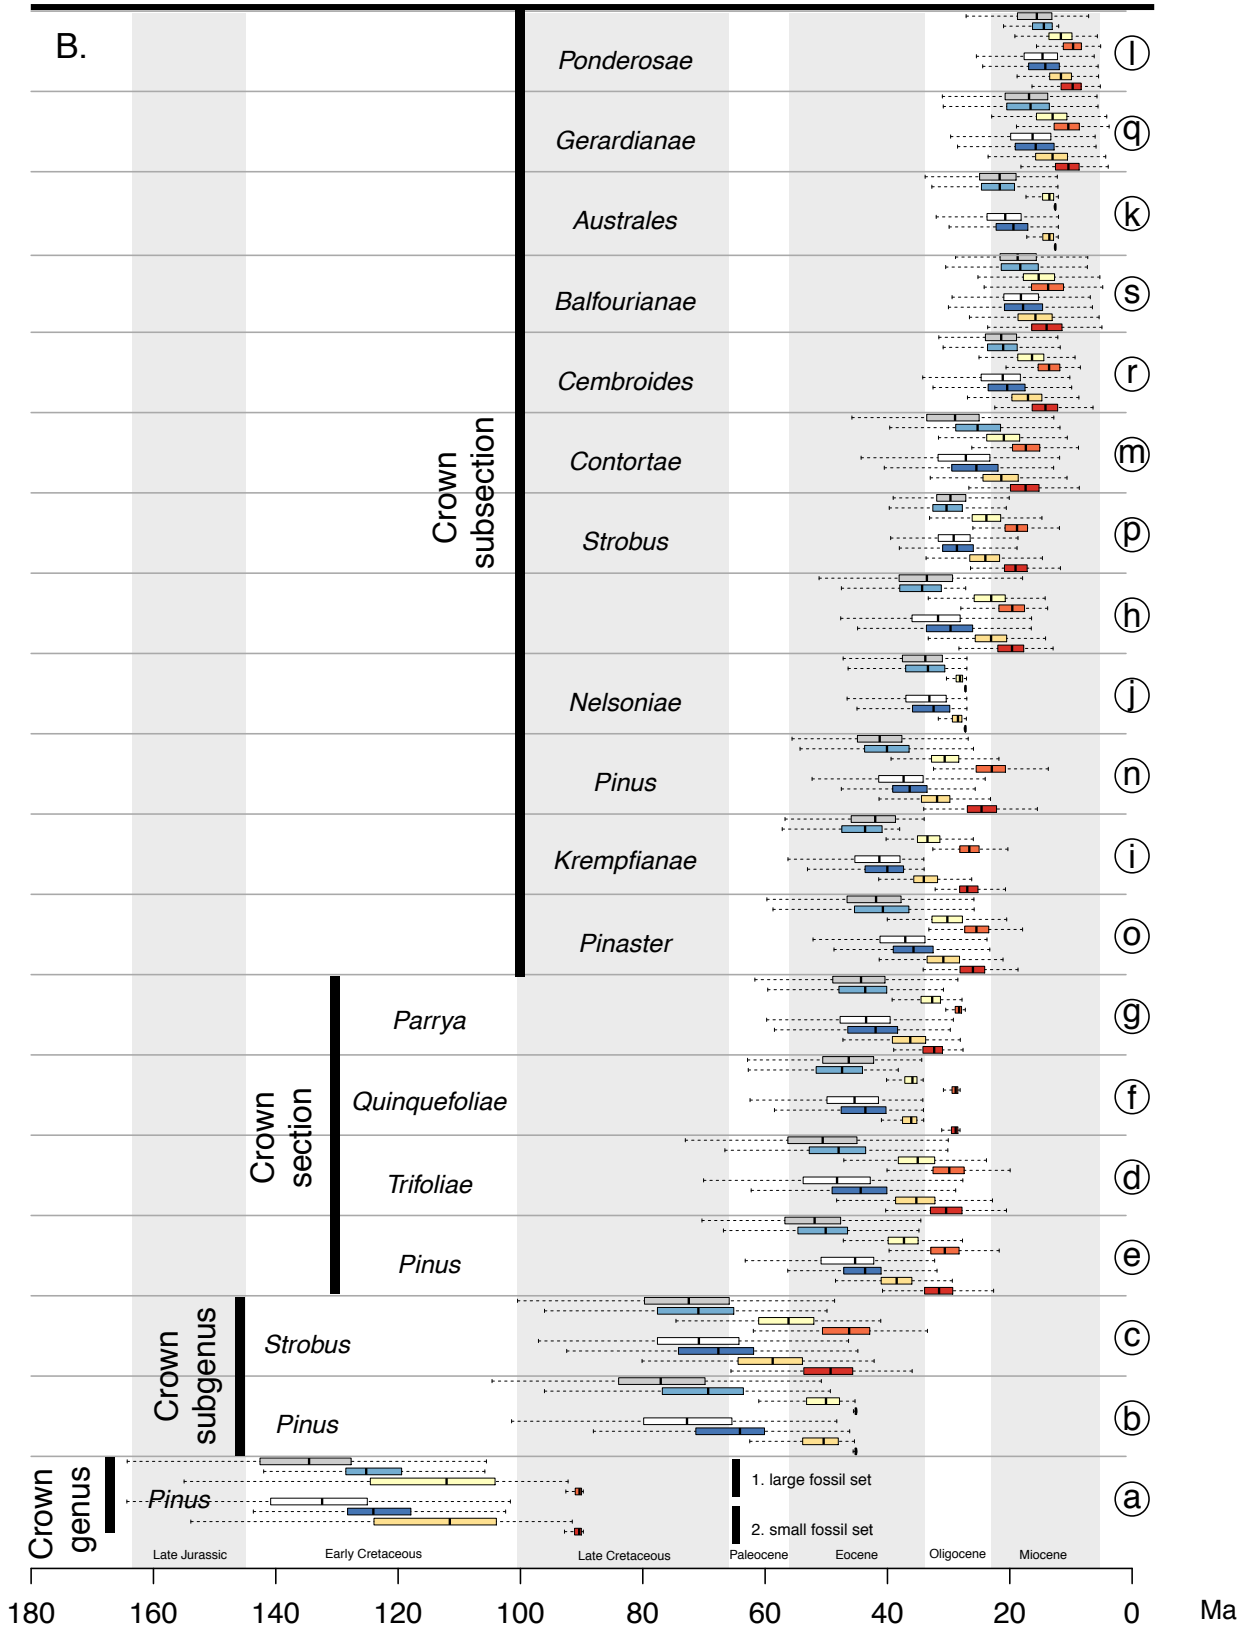

Supplement: 12862_2017_941_MOESM2_ESM.pdf [file 12862_2017_941_MOESM2_ESM.pdf]
