# Supplementary material for: Fossils matter: improved estimates of divergence times in Pinus reveal older diversification
Source: PubMed Central journal article supplement (PMC5381128; doi:10.1186/s12862-017-0941-z), 2017-04-04
Supplement: 12862_2017_941_MOESM10_ESM.pdf [file 12862_2017_941_MOESM10_ESM.pdf]

---

**Settings used**

alignment : ./chloro\_all\_spp\_PARTITIONFINDER.nex  
branchlengths : linked  
models : HKY+G, GTR+I, GTR+G, HKY+I, GTR, HKY, JC+G, JC+I, JC  
model\_selection : bic  
search : greedy

**Best partitioning scheme**

Scheme Name : step\_5  
Scheme lnL : -15786.16616  
Scheme BIC : 33758.9182389  
Number of params : 252  
Number of sites : 5866  
Number of subsets : 3

**Subset | Best Model | Subset Partitions****| Subset Sites**

|   |       |                                                             |                                                  |
|---|-------|-------------------------------------------------------------|--------------------------------------------------|
| 1 | GTR+I | accD_fasta, matK_fasta, rpoB_fasta, rpoC1_fasta, trnV_fasta | 1-910, 911-2290, 3640-3982, 3983-4365, 4366-4847 |
| 2 | HKY+I | rbcL_fasta, rpl20_fasta                                     | 2291-3544, 3545-3639                             |
| 3 | GTR+G | ycf1_fasta                                                  | 4848-5866                                        |

**Scheme Description in PartitionFinder format**

Scheme\_step\_5 = (accD\_fasta, matK\_fasta, rpoB\_fasta, rpoC1\_fasta, trnV\_fasta) (rbcL\_fasta, rpl20\_fasta) (ycf1\_fasta);

**RaxML-style partition definitions**

DNA, p1 = 1-910, 911-2290, 3640-3982, 3983-4365, 4366-4847

DNA, p2 = 2291-3544, 3545-3639

DNA, p3 = 4848-5866

---
