# Supplementary material for: Fossils matter: improved estimates of divergence times in Pinus reveal older diversification
Source: BMC Evol Biol. 2017 Apr 4;17:95. doi: 10.1186/s12862-017-0941-z (PMC5381128; doi:10.1186/s12862-017-0941-z)
Supplement: Supplementary file 8 — Accession numbers of used gene sequences downloaded from GenBank. Asterisks on accession numbers indicate sequences that are not linked to a published journal article. (PDF 67 kb) [file 12862_2017_941_MOESM8_ESM.pdf]

|                          |           |           |           |           |           |           |           |           |
|--------------------------|-----------|-----------|-----------|-----------|-----------|-----------|-----------|-----------|
| <i>P. juarezensis</i>    | -         | AY115770  | AY115742  | -         | -         | -         | -         | -         |
| <i>P. kesiya</i>         | JN854191  |
| <i>P. koraiensis</i>     | AY228468* |
| <i>P. krempfii</i>       | EU998742  |
| <i>P. kwangtungensis</i> | JN854153  | JN854151  |
| <i>P. lambertiana</i>    | EU998743  |
| <i>P. latteri</i>        | JN854190  |
| <i>P. lawsonii</i>       | JN854188  | KC157094  |
| <i>P. leiophylla</i>     | JN854218  | KC157132  |
| <i>P. longaeva</i>       | -         | EU998744  |
| <i>P. luchuensis</i>     | -         | AB097780* | AB097772* | -         | -         | -         | AB097788* | -         |
| <i>P. lumholtzii</i>     | JN854186  | KC157168  |
| <i>P. maestrensis</i>    | -         | AB080939* | AB063371* | -         | -         | -         | AB063587* | -         |
| <i>P. massoniana</i>     | JN854185  | KC427272  |
| <i>P. maximartinezii</i> | JN854184  |
| <i>P. maximinoi</i>      | -         | AB161010* | AB161040* | -         | AM883786* | -         | -         | KC157109  |
| <i>P. merkusii</i>       | FJ899579  | AY497287  | AY497251  | -         | FJ899579  | FJ899579  | FJ899579  | FJ899579  |
| <i>P. monophylla</i>     | -         | EU998745  |
| <i>P. montezumae</i>     | JN854183  |
| <i>P. monticola</i>      | FJ899580  | GQ478182* | AY497223  | GQ478185* | FJ899580  | FJ899580  | FJ899580  | FJ899580  |
| <i>P. morrisonicola</i>  | JN854182  |
| <i>P. mugo</i>           | JN854181  |
| <i>P. muricata</i>       | JN854180  | AB080935* | JN854180  | JN854180  | JN854180  | JN854180  | JN854180  | JN854180  |
| <i>P. nelsonii</i>       | EU998746  |
| <i>P. nigra</i>          | JN854179  |
| <i>P. occidentalis</i>   | JN854177  |
| <i>P. oocarpa</i>        | -         | AB081084* | DQ353726* | -         | AM883774* | -         | AB063598* | KC157141  |
| <i>P. palustris</i>      | JN854176  | KC157163  |
| <i>P. parviflora</i>     | FJ899581  | FJ899581  | EU269033  | FJ899581  | FJ899581  | FJ899581  | AB019874  | FJ899581  |
| <i>P. patula</i>         | JN854175  |
| <i>P. peuce</i>          | FJ899582  | AY497254  | FJ899582  | FJ899582  | FJ899582  | FJ899582  | FJ899582  | FJ899582  |
| <i>P. pinaster</i>       | FJ899583  |
| <i>P. pinceana</i>       | JN854174  |
| <i>P. pinea</i>          | JN854173  |
| <i>P. ponderosa</i>      | JN854172  | KC157127  |
| <i>P. praetermissa</i>   | -         | DQ353711* | DQ353727* | -         | -         | -         | -         | KC157122  |
| <i>P. pringlei</i>       | JN854189  | KC157095  |
| <i>P. pseudostrobus</i>  | JN854178  | KC157192  |
| <i>P. pumila</i>         | JN854168  | -         |
| <i>P. pungens</i>        | JN854167  | KC157206  |
| <i>P. quadrifolia</i>    | JN854166  |
| <i>P. radiata</i>        | JN854165  | KC157207  |
| <i>P. remota</i>         | JN854164  |
| <i>P. resinosa</i>       | FJ899556  | KC157078  |
| <i>P. rigida</i>         | JN854163  | KC157079  |
| <i>P. roxburghii</i>     | JN854162  |
| <i>P. rzedowskii</i>     | FJ899557  | FJ899557  | FJ899557  | FJ899557  | FJ899557  | FJ899557  | -         | FJ899557  |
| <i>P. sabiniana</i>      | JN854161  | KC157111  |
| <i>P. serotina</i>       | JN854160  | KC157164  |
| <i>P. sibirica</i>       | FJ899558  |
| <i>P. squamata</i>       | FJ899559  |
| <i>P. strobiformis</i>   | JN854159  |
| <i>P. strobus</i>        | FJ899560  |

[illegible]
